# Supplementary figures and images for: Gb_ANR-47 Enhances the Resistance of Gossypium barbadense to Fusarium oxysporum f. sp. vasinfectum (FOV) by Regulating the Content of Proanthocyanidins
Source: MDPI journal article supplement (doi:10.3390/plants11151902), 2022-07-22

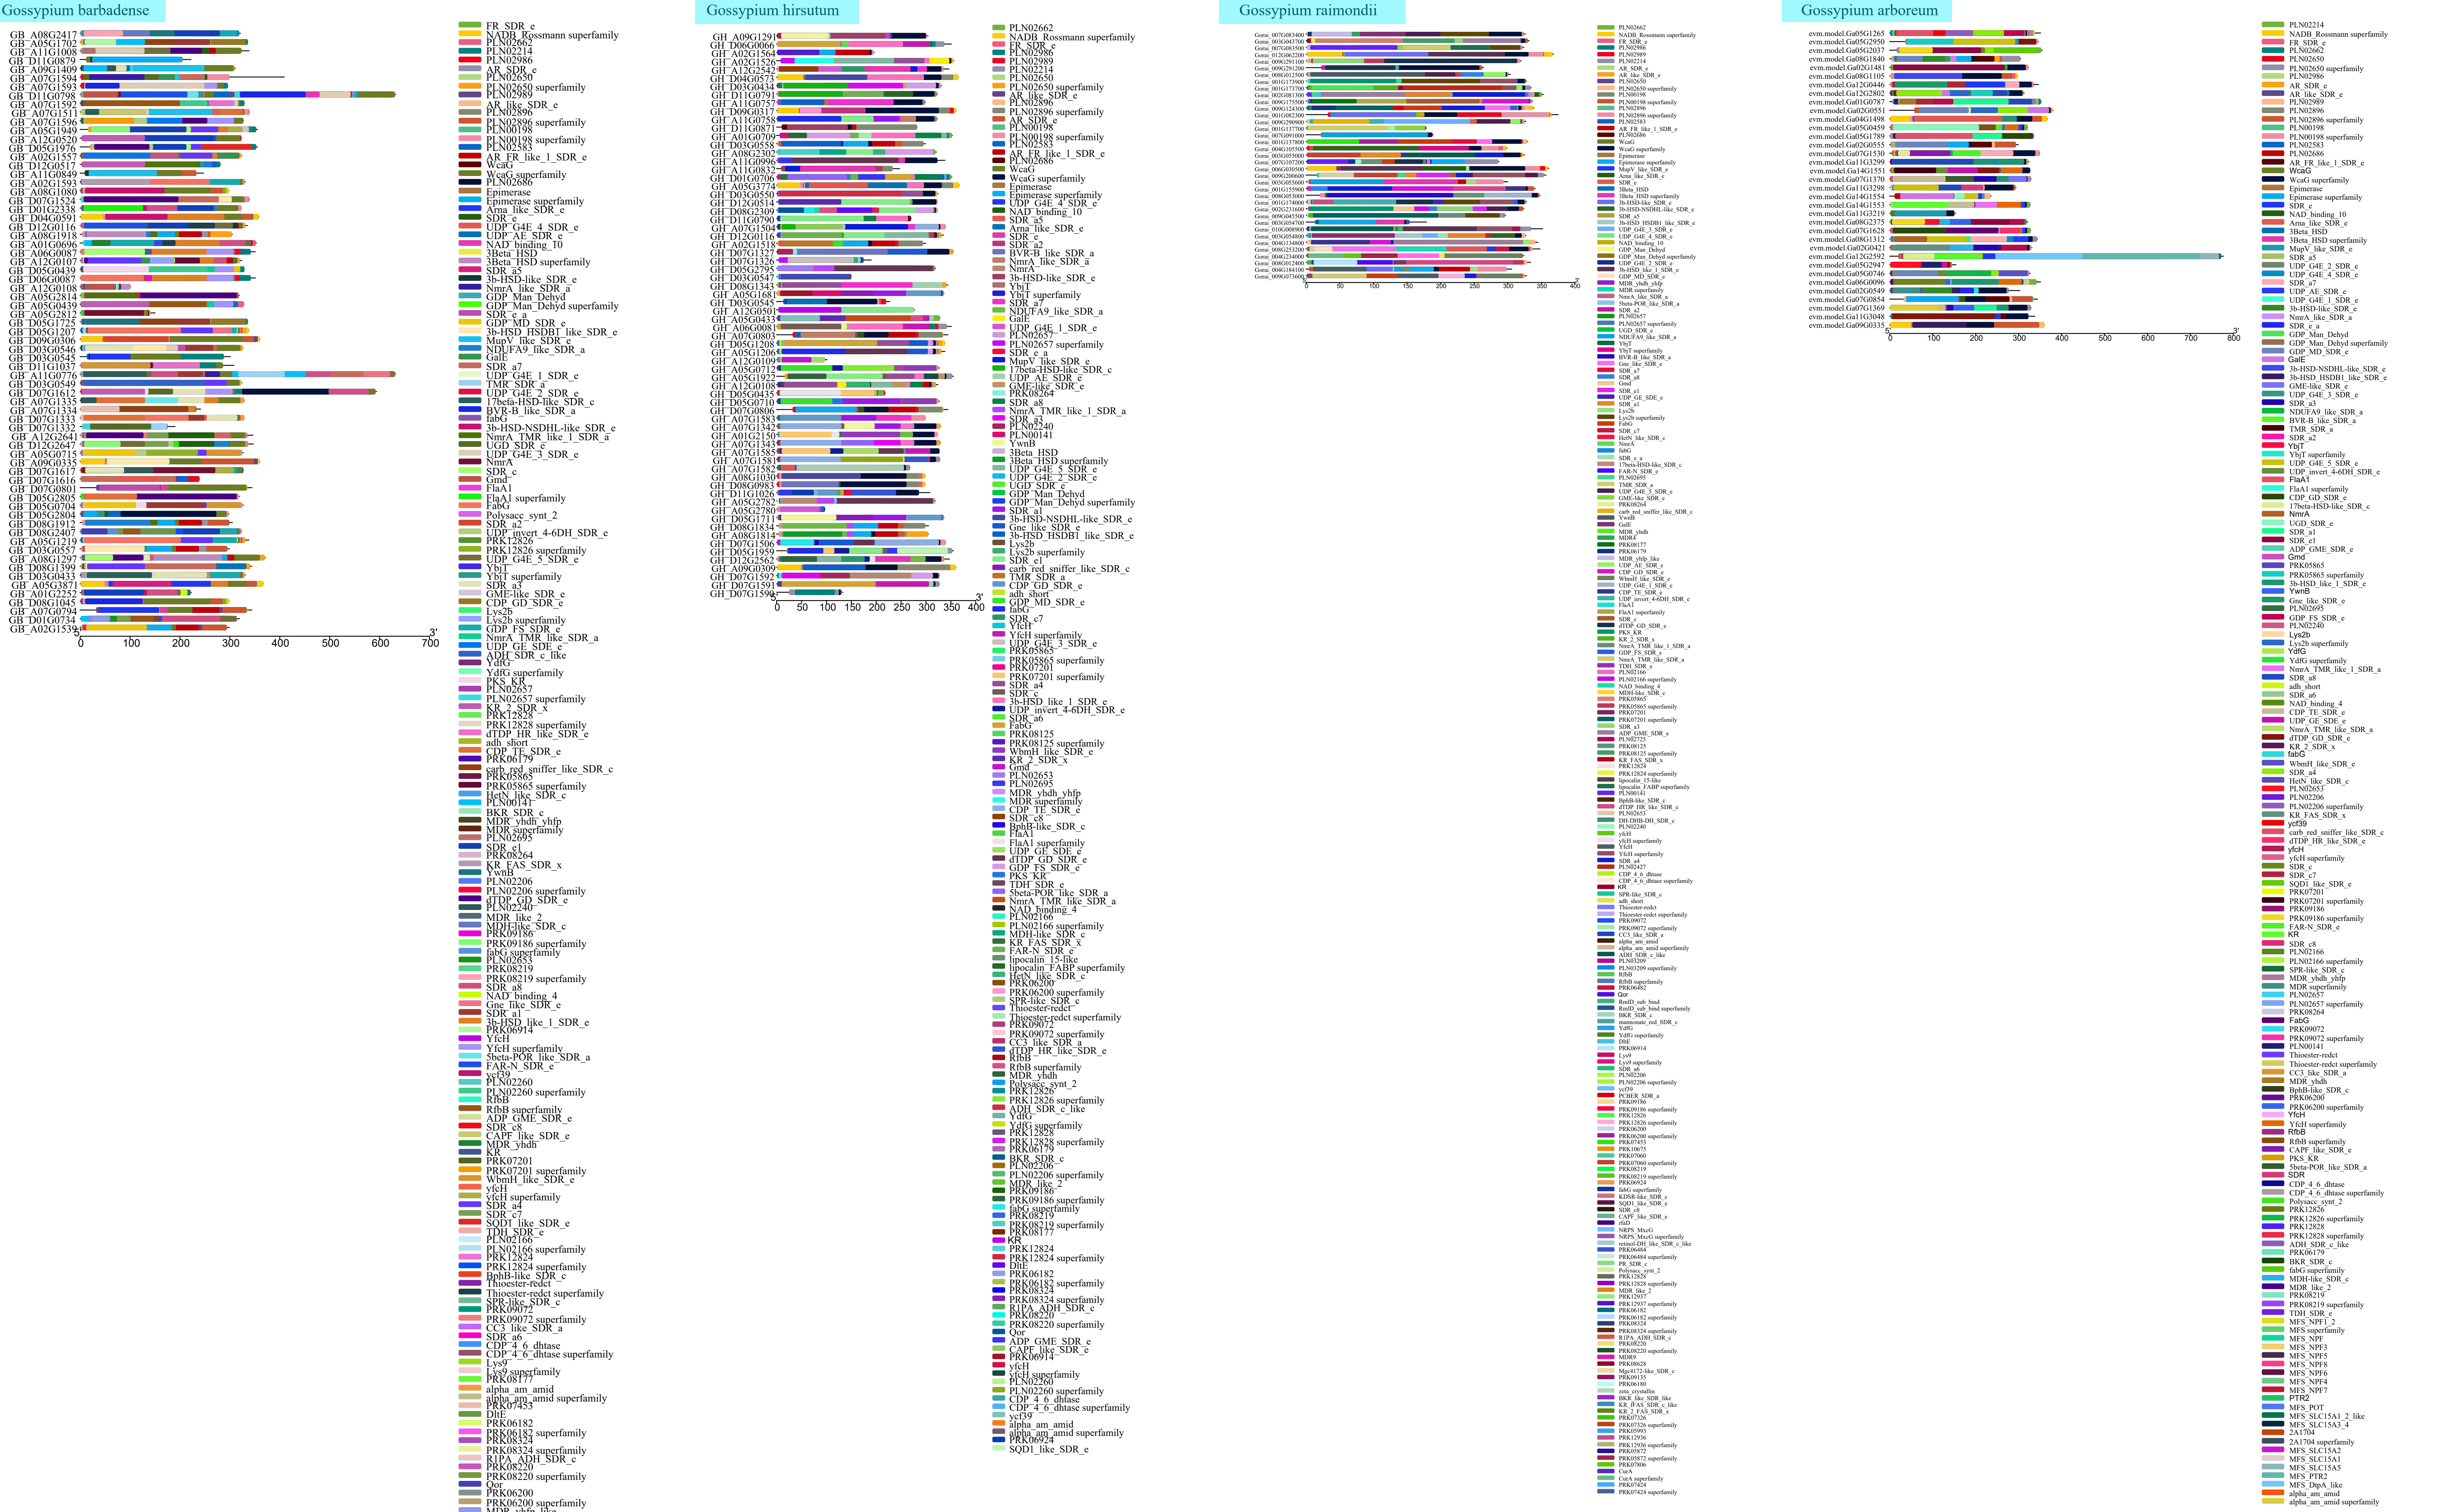

Supplement: s1 [file s1]

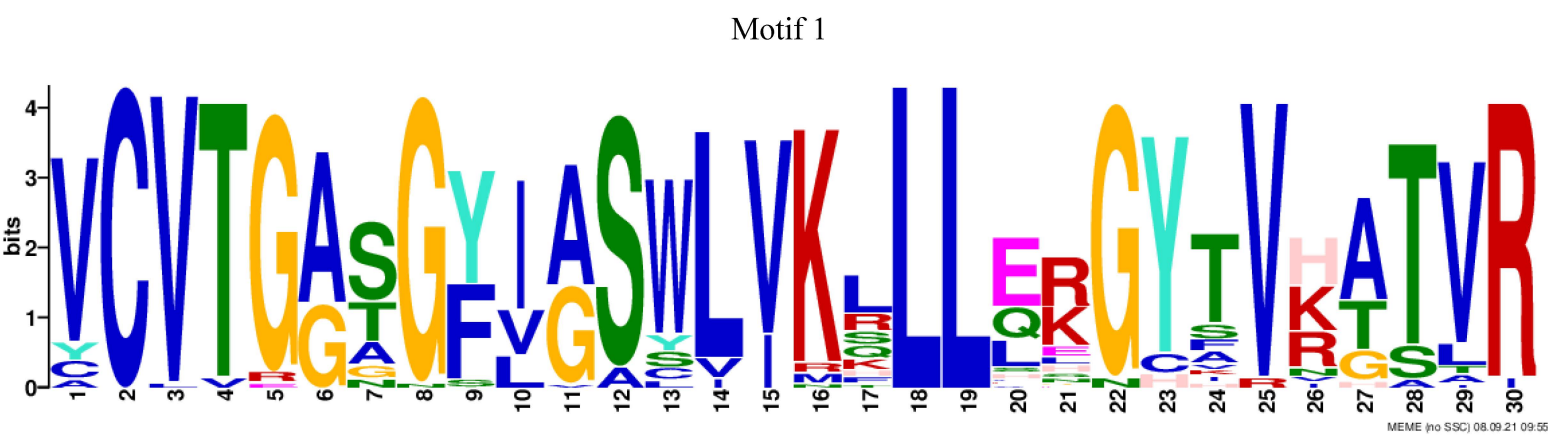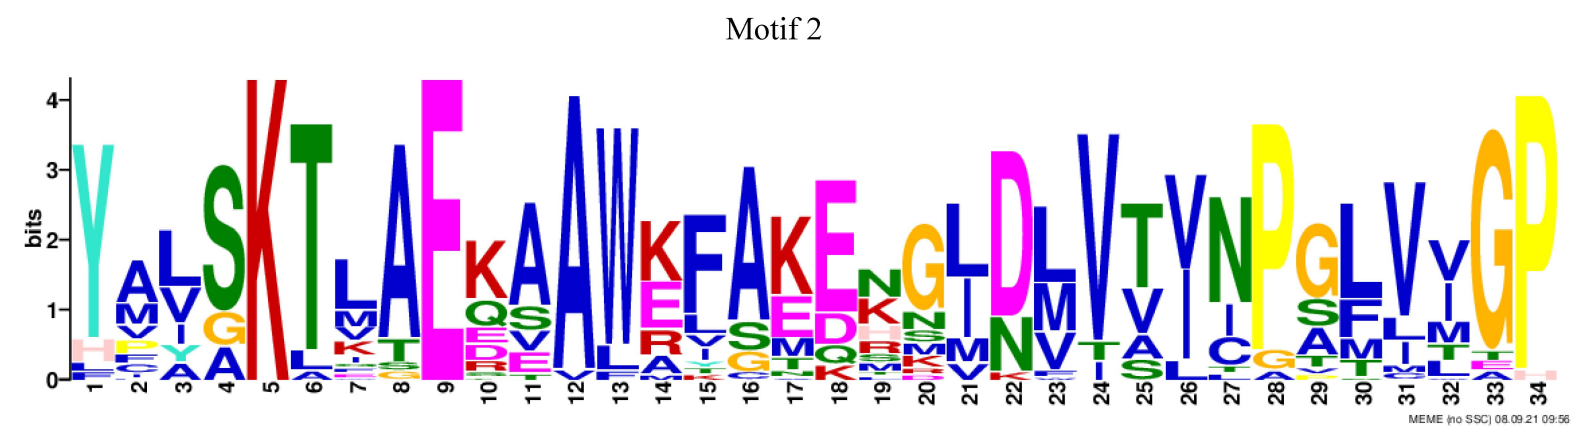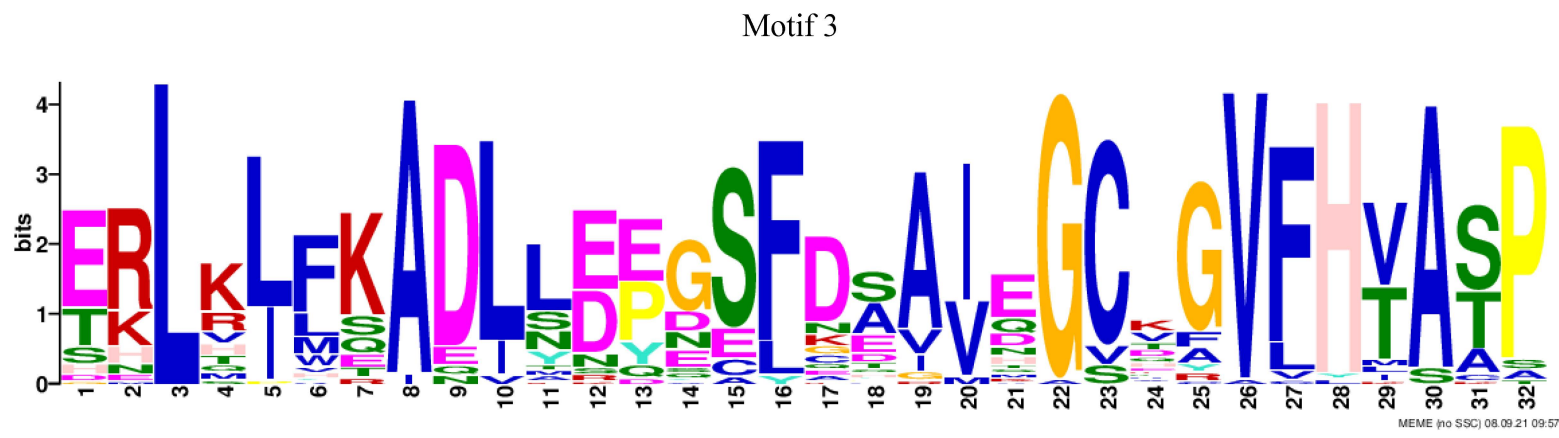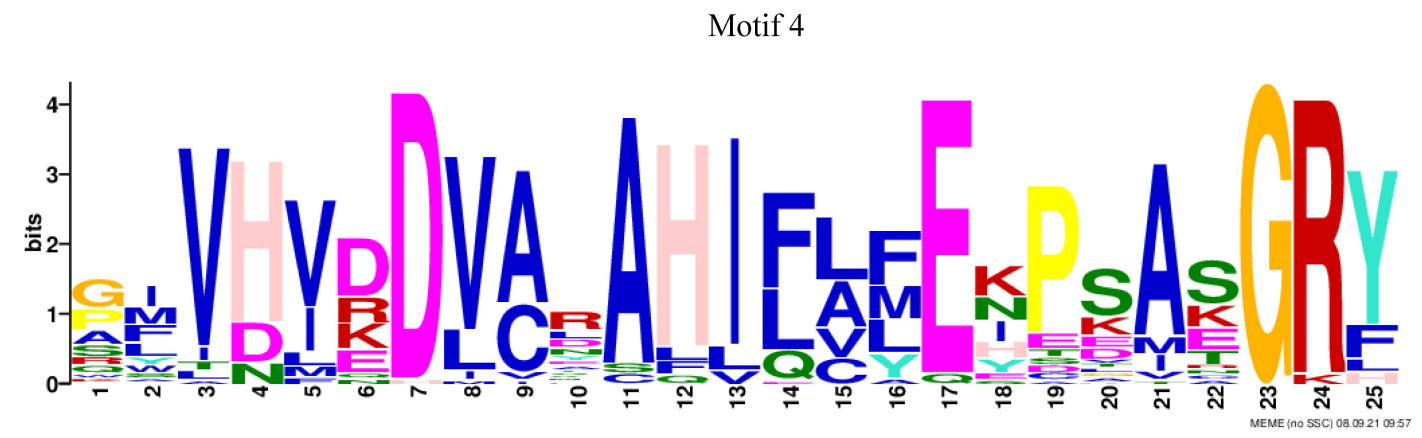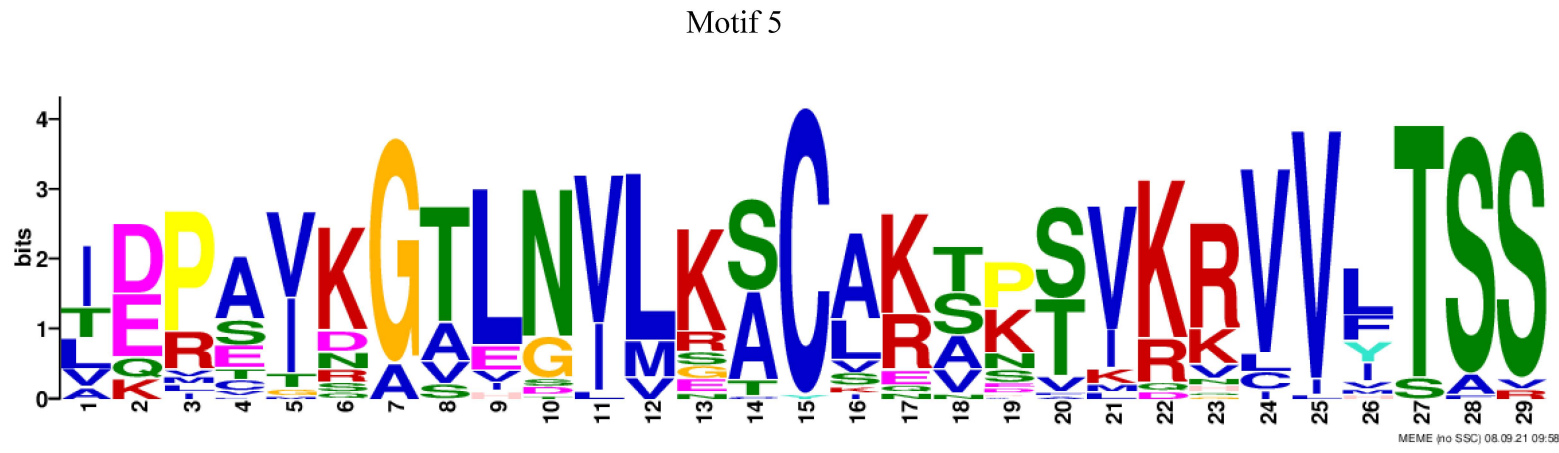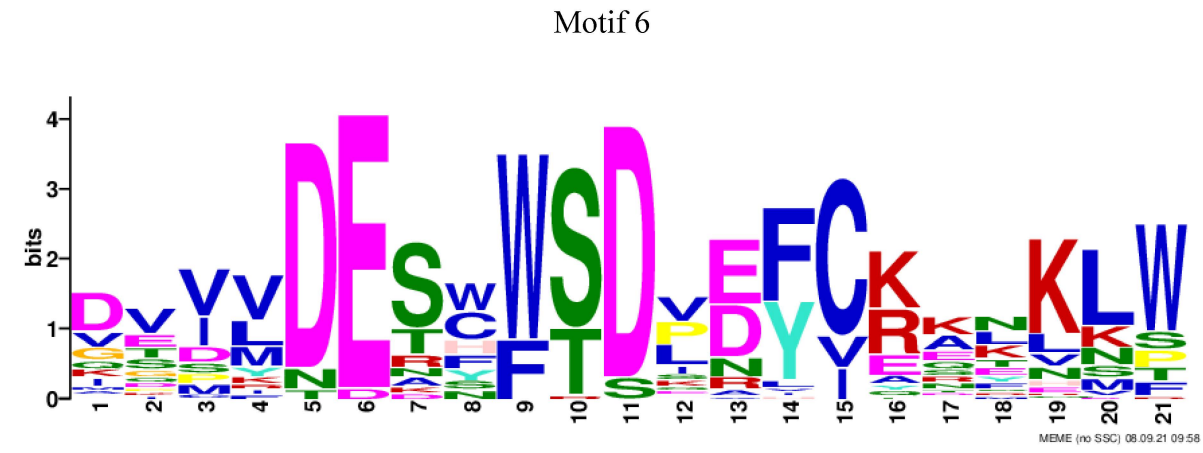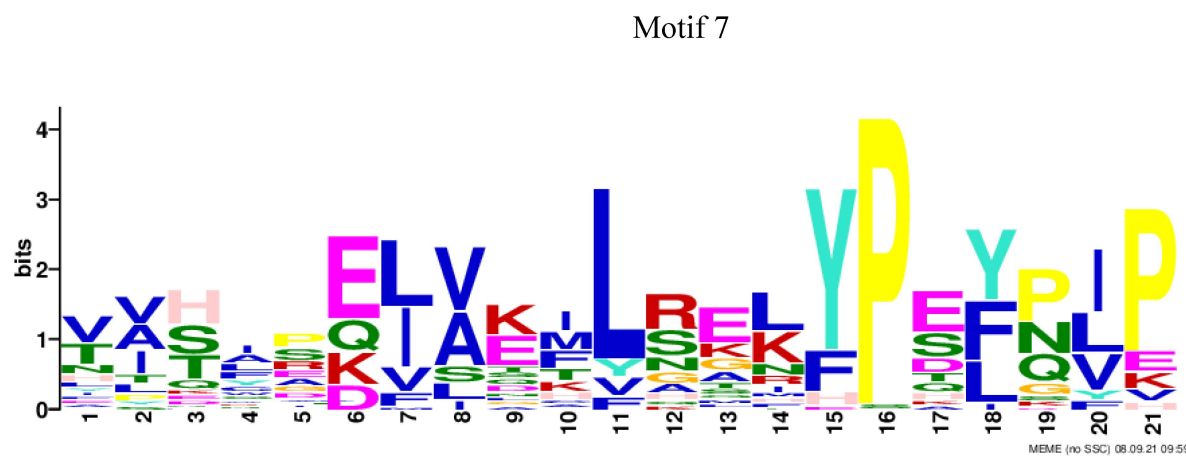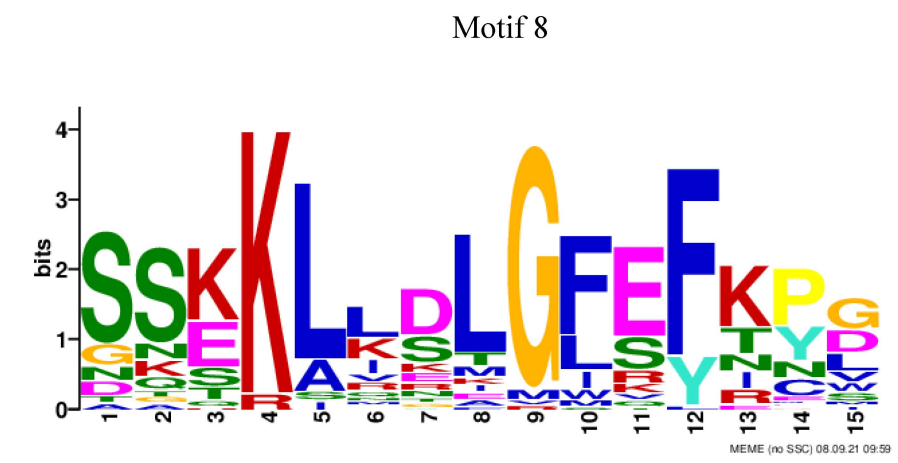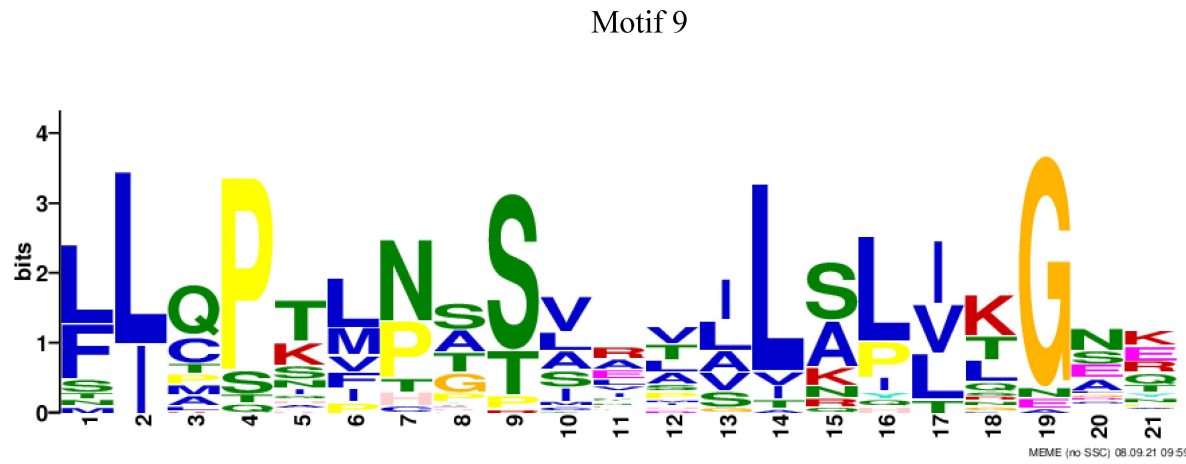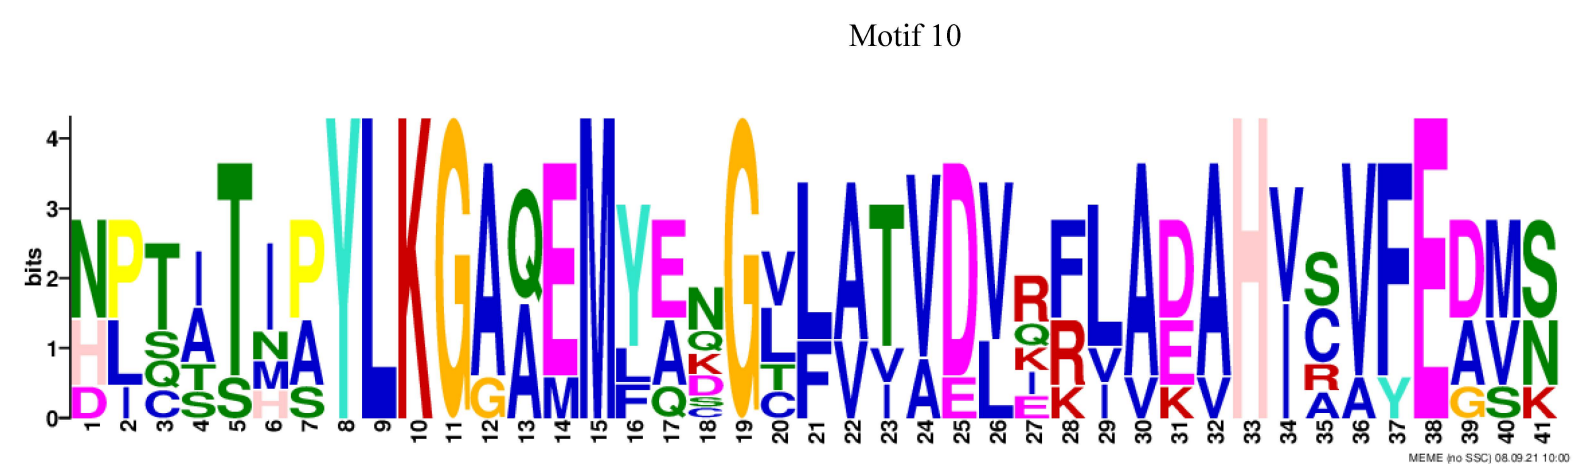

Figure S2. Conservative motifs of ANR gene family in *G. barbadense*

Supplement: s1 [file s1]
